# Supplementary material
Source: PubMed Central journal article supplement (PMC5771893)

# Supplementary Figure 1

a.

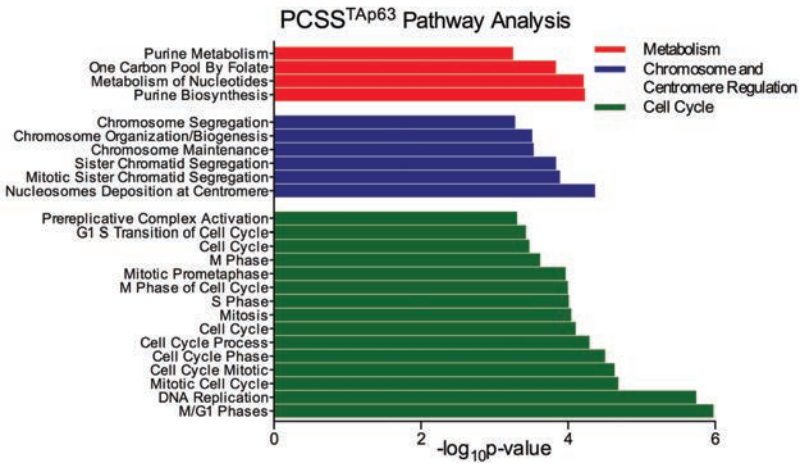

b.

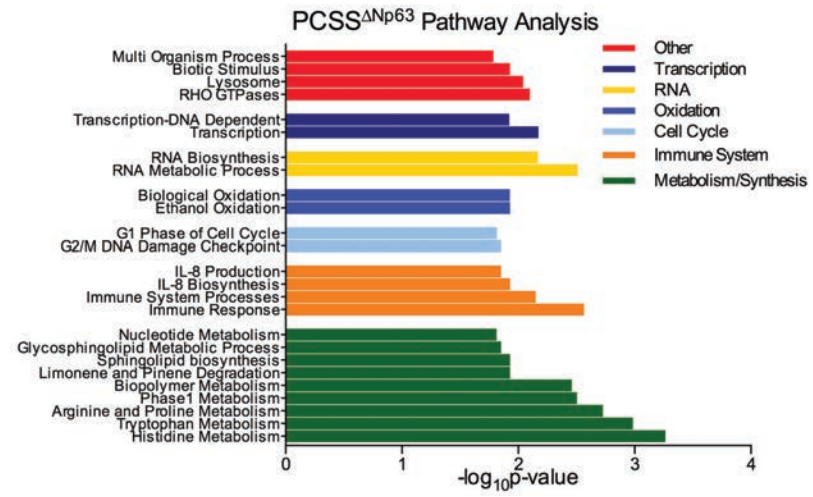

**Supplementary Figure 2**

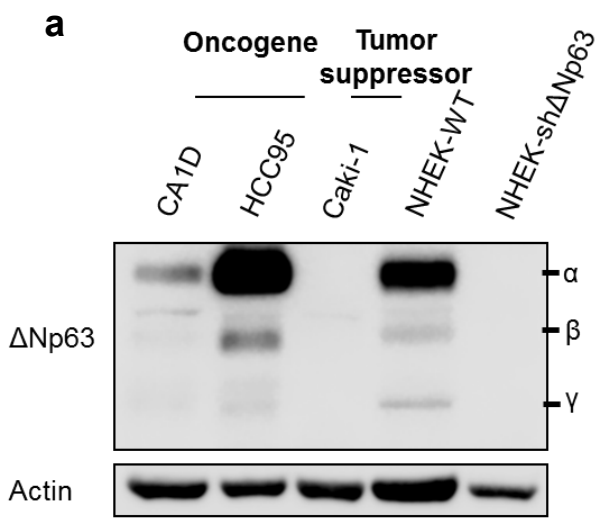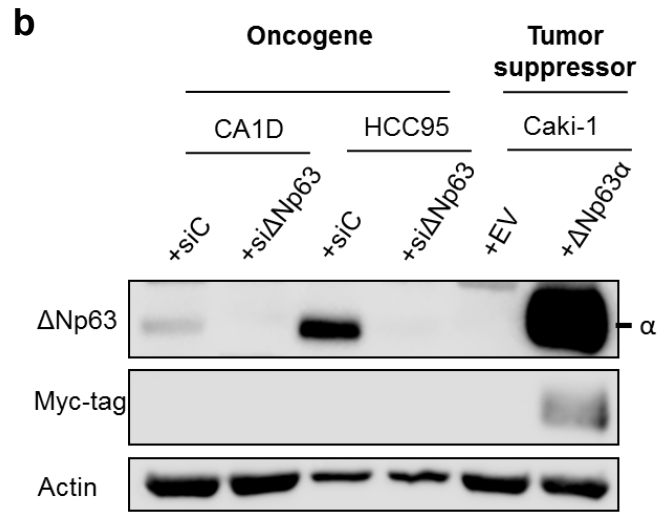

# Supplementary Figure 3

**a**

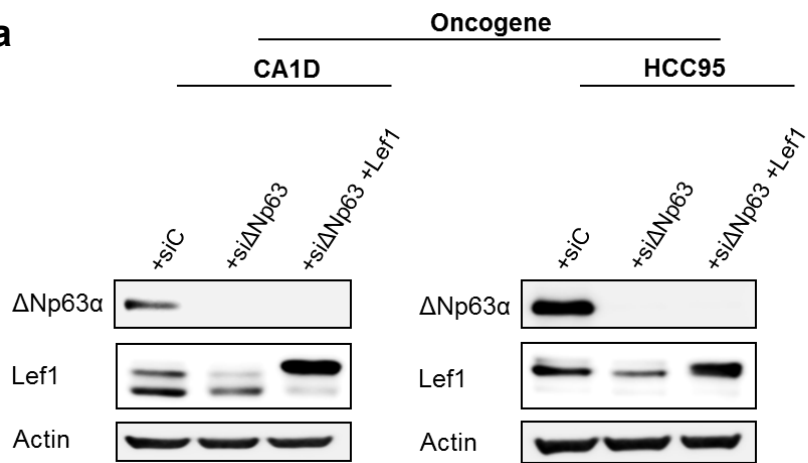

**b**

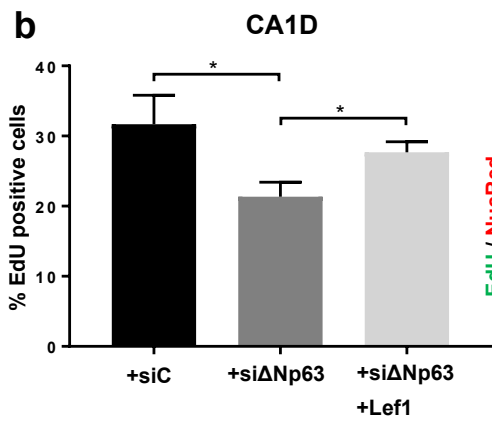

**c**

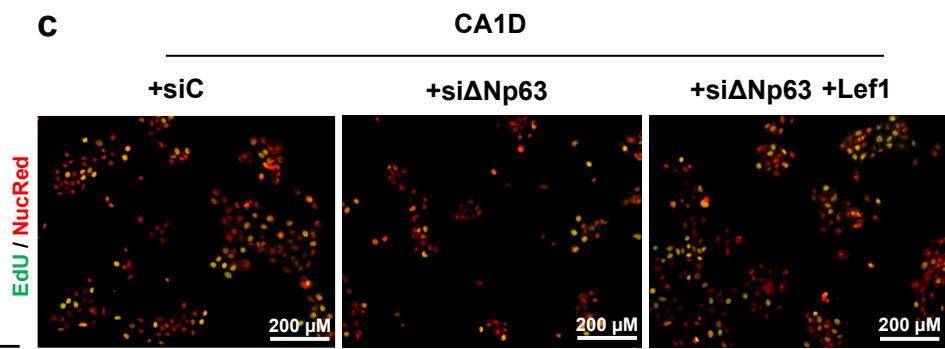

**d**

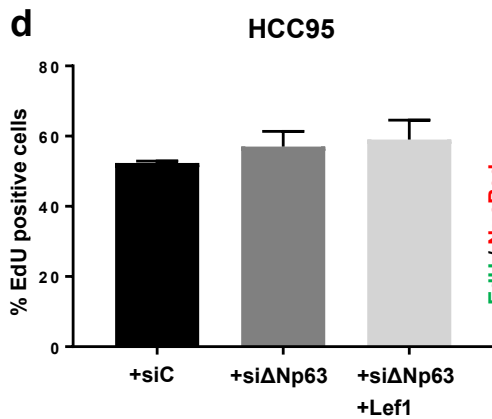

**e**

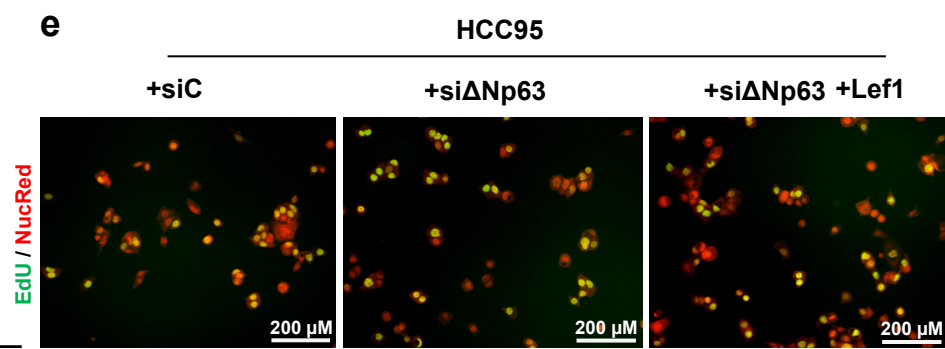

# Supplementary Figure 4

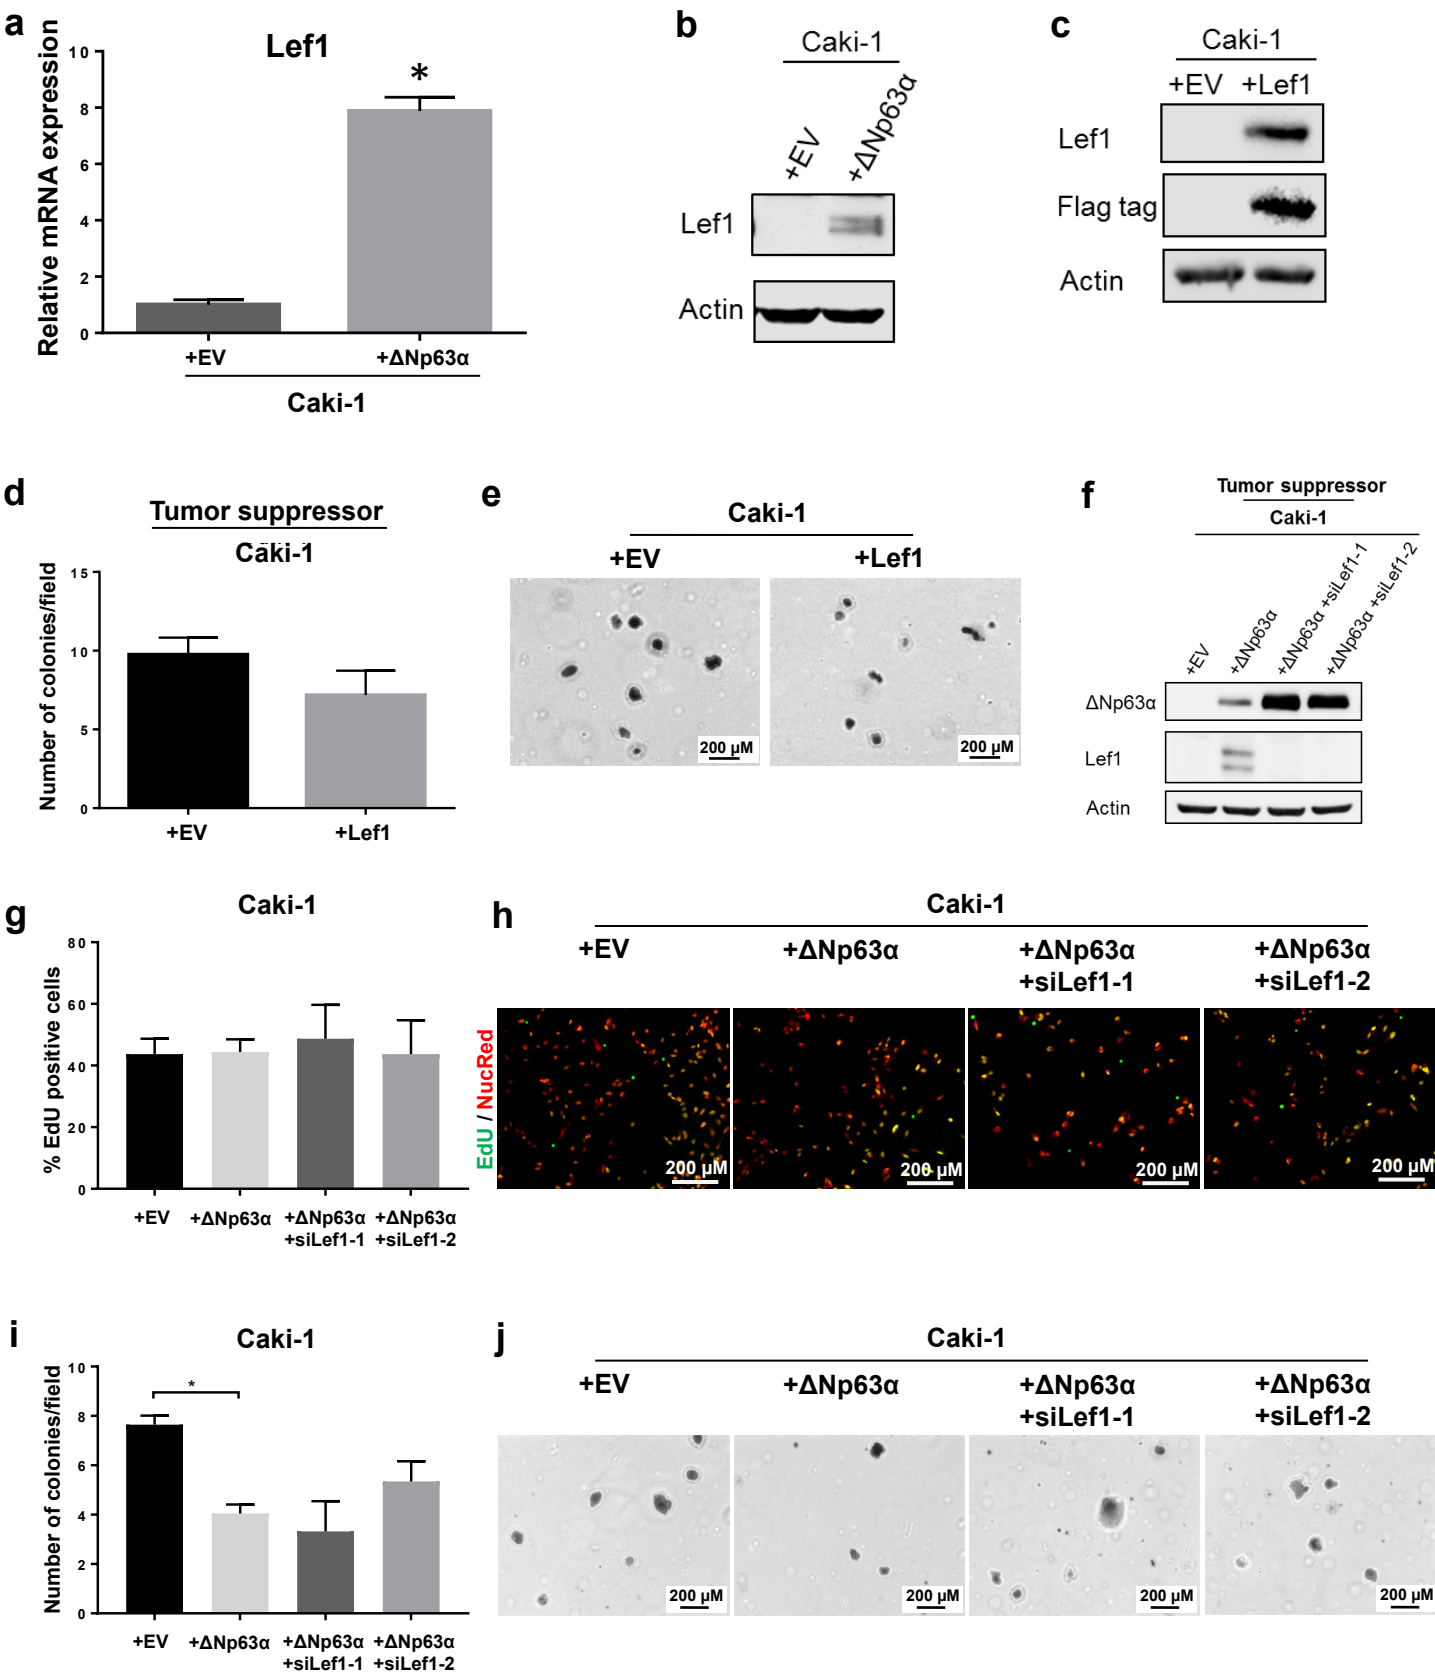



# Supplementary Figure 6

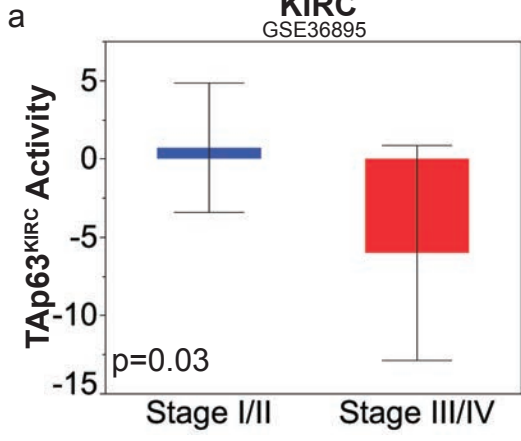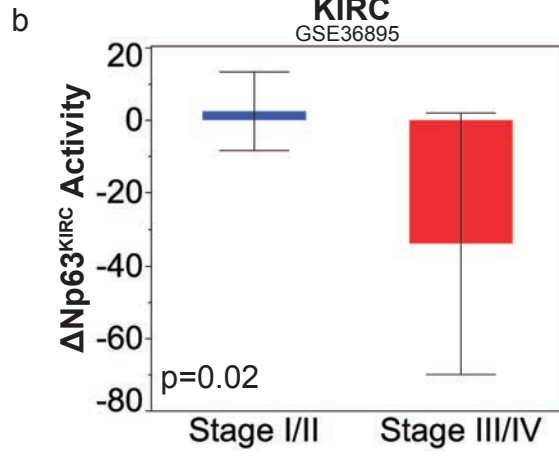

# Supplementary Figure 7

a

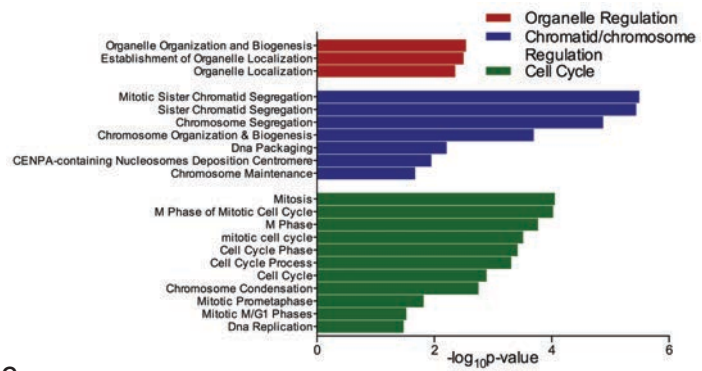

b

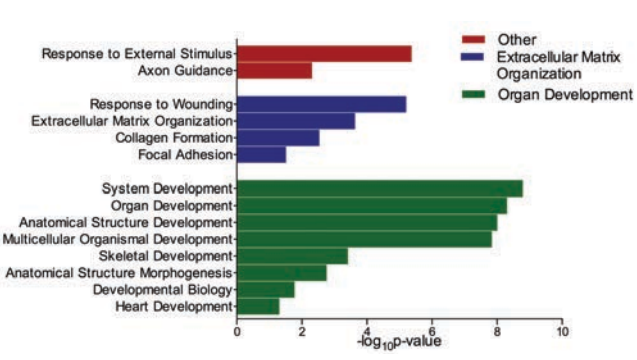

c

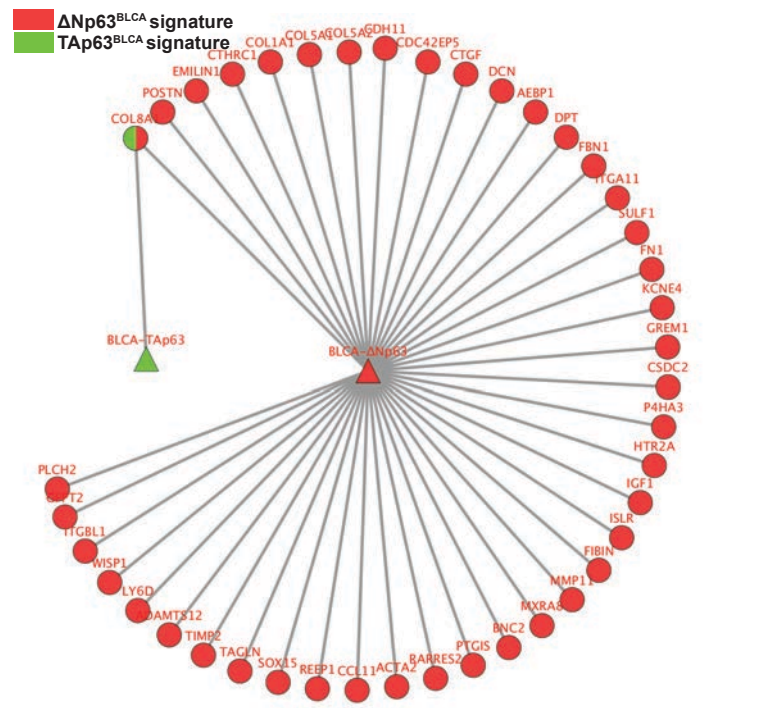

d

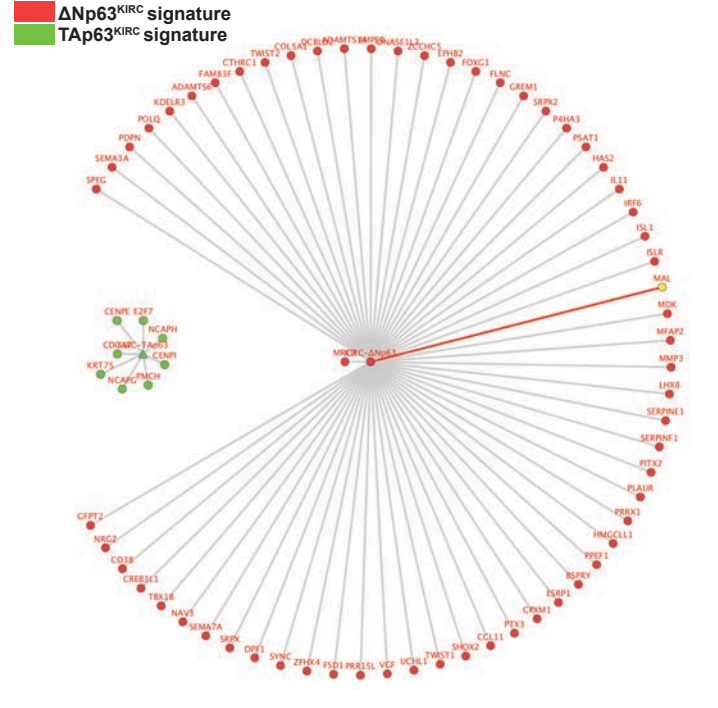

e

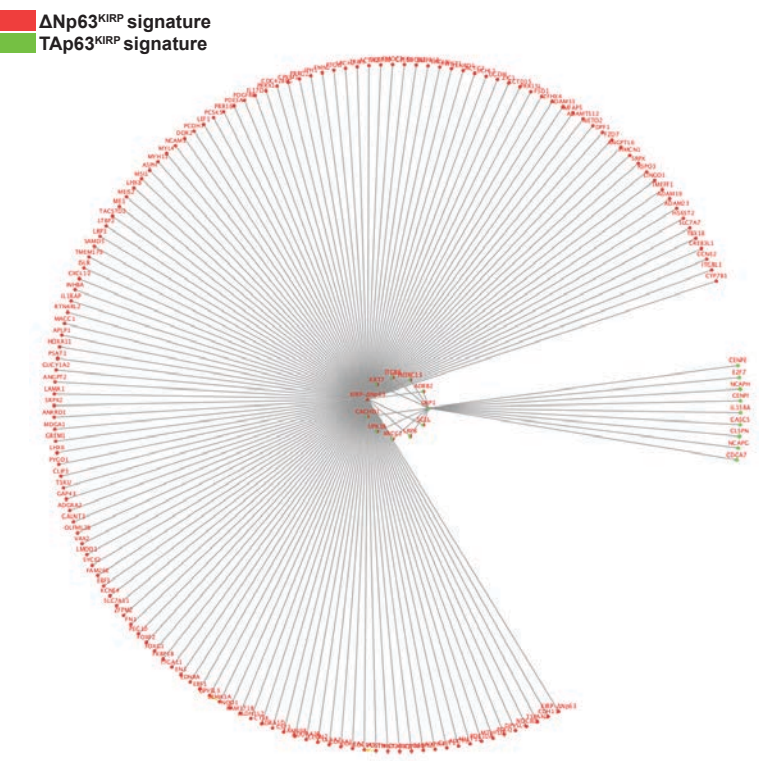

f

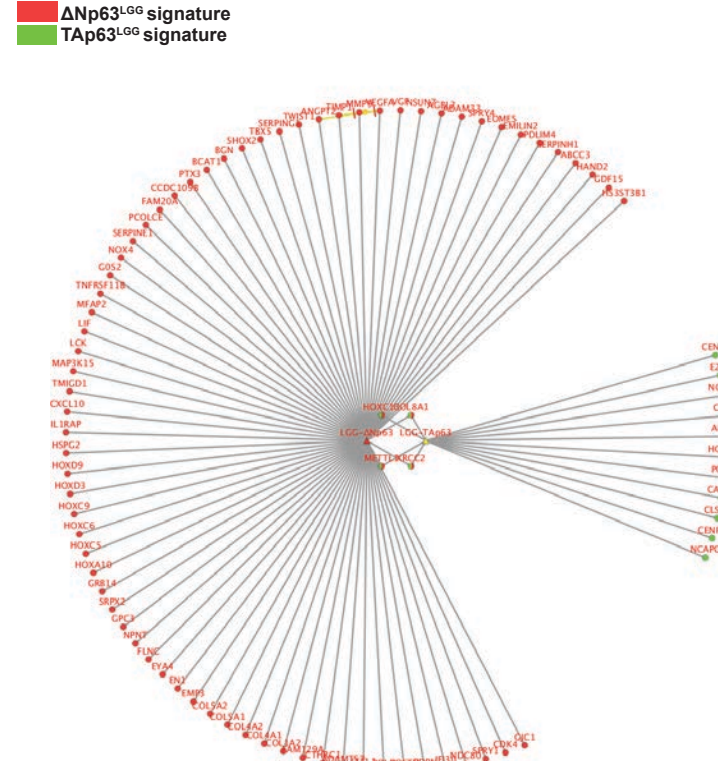

# Supplementary Figure 8

a

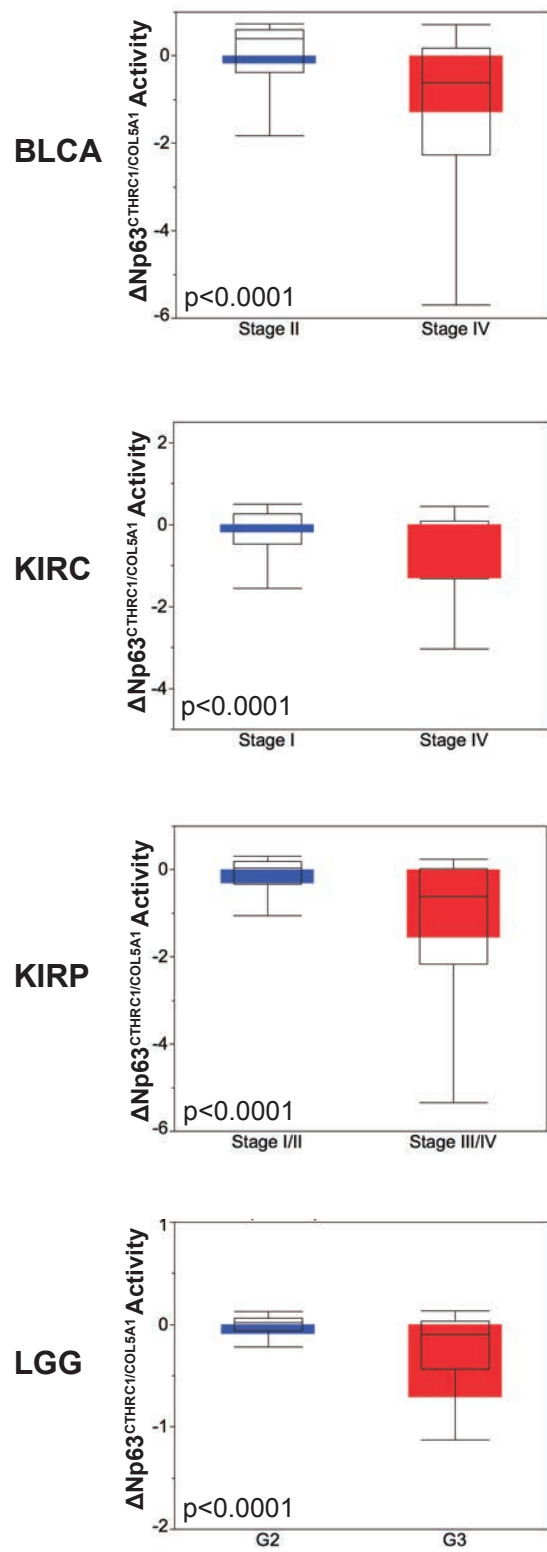

b

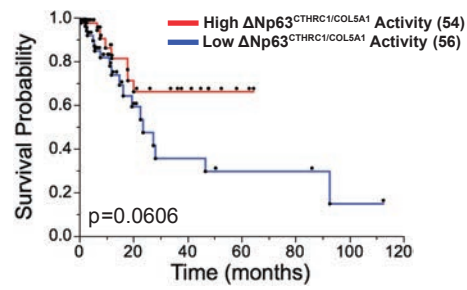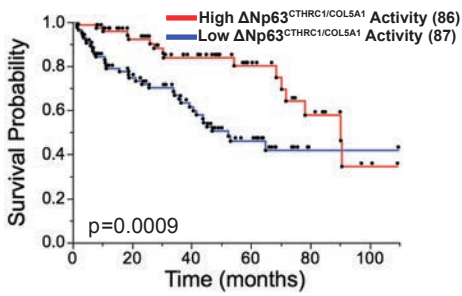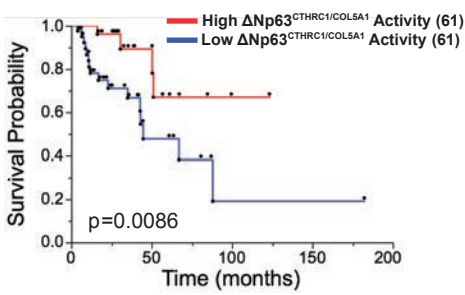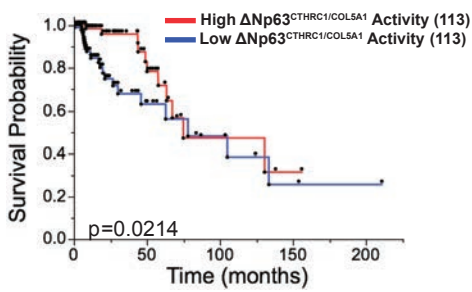



# Supplementary Figure 9

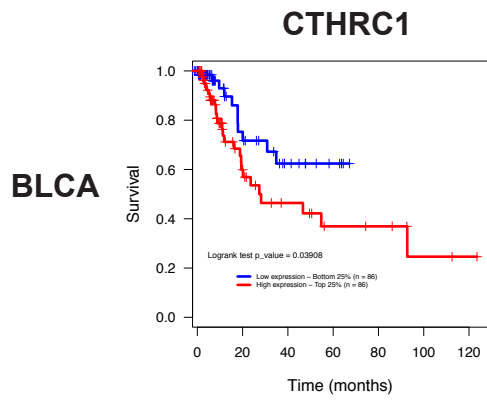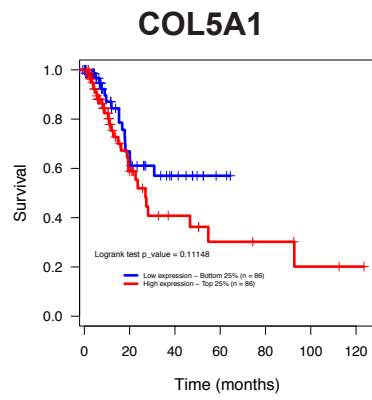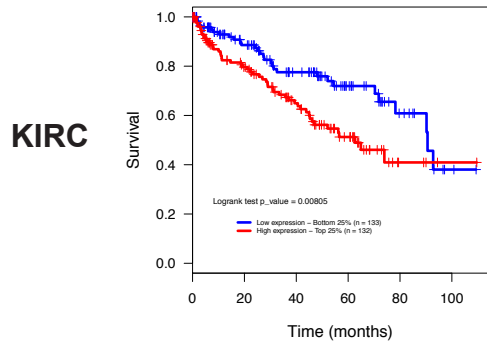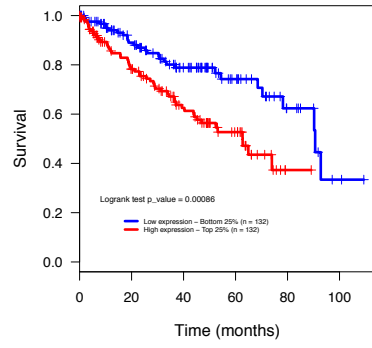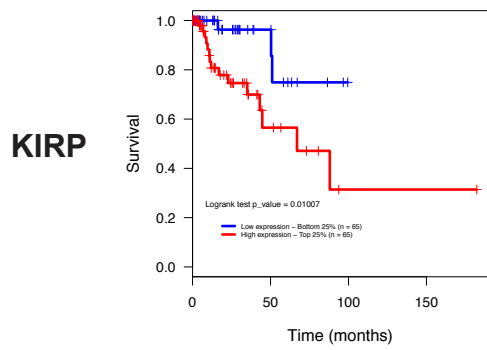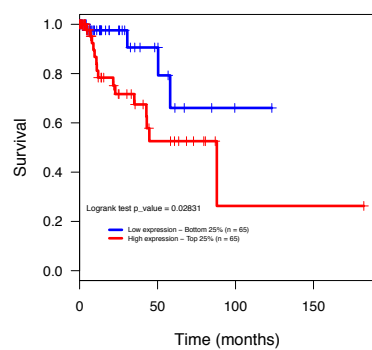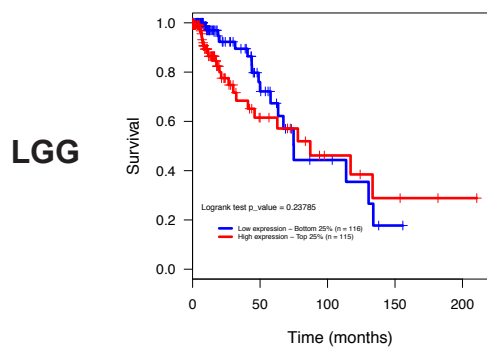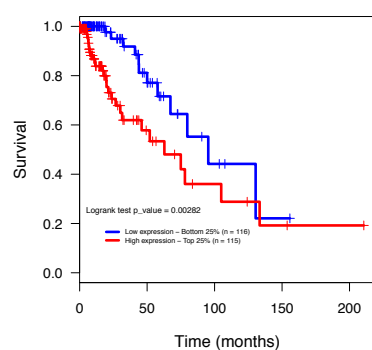

Supplement: NIHMS922303-supplement-1.pdf [file NIHMS922303-supplement-1.pdf]
